# Supplementary material for: Genome analysis of the sugar beet pathogen Rhizoctonia solani AG2-2IIIB revealed high numbers in secreted proteins and cell wall degrading enzymes
Source: PubMed Central journal article supplement (PMC4794925; doi:10.1186/s12864-016-2561-1), 2016-03-17

A

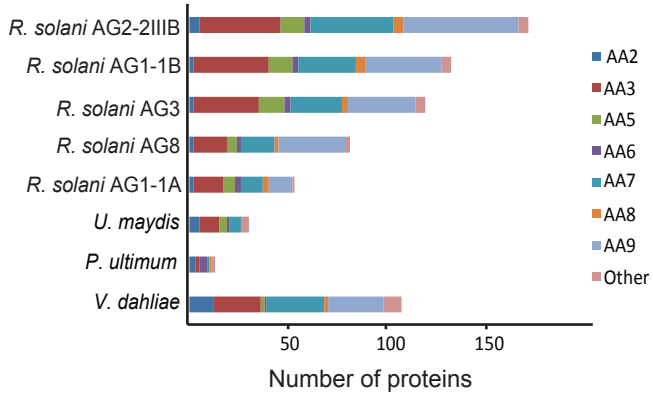

B

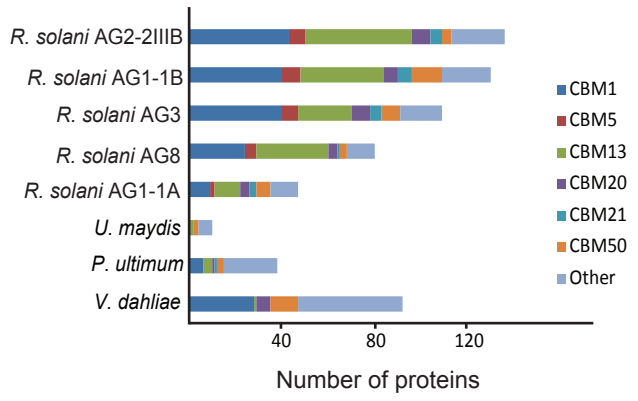

C

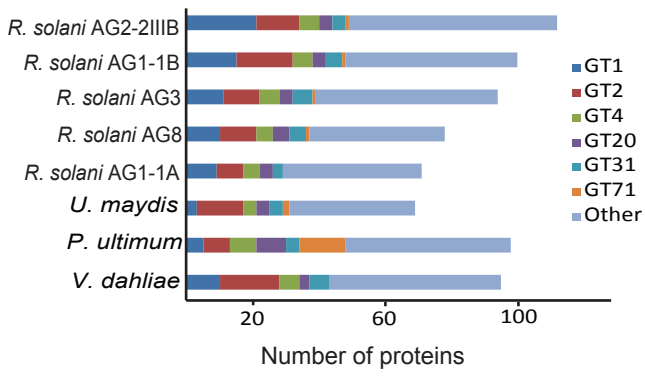

Supplement: 12864_2016_2561_MOESM10_ESM.pdf [file 12864_2016_2561_MOESM10_ESM.pdf]
